# Supplementary material for: H+-Translocating Membrane-Bound Pyrophosphatase from Rhodospirillum rubrum Fuels Escherichia coli Cells via an Alternative Pathway for Energy Generation
Source: MDPI journal article supplement (doi:10.3390/microorganisms11020294), 2023-01-23
Supplement: s1 [file s1]

## Supplementary Materials

**Table S1.** Metabolic map of *E. coli* central metabolism used for <sup>13</sup>C-MFA.

| Pathway        | No. | Reaction                          | Rearrangement of carbon atoms | Type of reaction* |
|----------------|-----|-----------------------------------|-------------------------------|-------------------|
| Input          | 1   | glc_D_e = glc_D_c                 | abcdef = abcdef               | F                 |
| PTS transport  | 2   | glc_D_c + pep_c = g6p_c + pyr_c   | abcdef + ghi = abcdef + ghi   | F                 |
| EMP            | 3   | g6p_c = f6p_c                     | abcdef = abcdef               | FR                |
|                | 4   | f6p_c = g6p_c                     | abcdef = abcdef               | R                 |
|                | 5   | f6p_c + ATP = fdp_c               | abcdef + X = abcdef           | F                 |
|                | 6   | fdp_c = f6p_c                     | abcdef = abcdef               | F                 |
|                | 7   | fdp_c = dhap_c + g3p_c            | abcdef = abc + def            | FR                |
|                | 8   | dhap_c + g3p_c = fdp_c            | abc + def = abcdef            | R                 |
|                | 9   | dhap_c = g3p_c                    | abc = cba                     | FR                |
|                | 10  | g3p_c = dhap_c                    | cba = abc                     | R                 |
|                | 11  | g3p_c = 13dpg_c + NADH            | abc = abc + X                 | FR                |
|                | 12  | 13dpg_c + NADH = g3p_c            | abc + X = abc                 | R                 |
|                | 13  | 13dpg_c = 3pg_c + ATP             | abc = abc + X                 | FR                |
|                | 14  | 3pg_c + ATP = 13dpg_c             | abc + X = abc                 | R                 |
|                | 15  | 3pg_c = pep_c                     | abc = abc                     | FR                |
|                | 16  | pep_c = 3pg_c                     | abc = abc                     | R                 |
|                | 17  | pep_c = pyr_c + ATP               | abc = abc + X                 | F                 |
|                | 18  | pyr_c + ATP + ATP = pep_c         | abc + X + X = abc             | F                 |
| PP             | 19  | g6p_c = 6pgc_c + NADPH            | abcdef = abcdef + X           | F                 |
|                | 20  | 6pgc_c = co2_c + ru5p_D_c + NADPH | abcdef = a + bcdef + X        | F                 |
|                | 21  | ru5p_D_c = xu5p_D_c               | abcde = abcde                 | FR                |
|                | 22  | xu5p_D_c = ru5p_D_c               | abcde = abcde                 | R                 |
|                | 23  | ru5p_D_c = r5p_c                  | abcde = abcde                 | FR                |
|                | 24  | r5p_c = ru5p_D_c                  | abcde = abcde                 | R                 |
|                | 25  | xu5p_D_c = c2 + g3p_c             | abcde = ab + cde              | FR                |
|                | 26  | c2 + g3p_c = xu5p_D_c             | ab + cde = abcde              | R                 |
|                | 27  | f6p_c = c2 + e4p_c                | abcdef = ab + cdef            | FR                |
|                | 28  | c2 + e4p_c = f6p_c                | ab + cdef = abcdef            | R                 |
|                | 29  | s7p_c = c2 + r5p_c                | abcdefg = ab + cdefg          | FR                |
|                | 30  | c2 + r5p_c = s7p_c                | ab + cdefg = abcdefg          | R                 |
|                | 31  | f6p_c = c3 + g3p_c                | abcdef = abc + def            | FR                |
|                | 32  | c3 + g3p_c = f6p_c                | abc + def = abcdef            | R                 |
|                | 33  | s7p_c = c3 + e4p_c                | abcdefg = abc + defg          | FR                |
|                | 34  | c3 + e4p_c = s7p_c                | abc + defg = abcdefg          | R                 |
| ED             | 35  | 6pgc_c = 2ddg6p_c                 | abcdef = abcdef               | F                 |
|                | 36  | 2ddg6p_c = g3p_c + pyr_c          | abcdef = def + abc            | F                 |
| PRPP synthesis | 37  | r5p_c + ATP + ATP = prpp_c        | abcde + X + X = abcde         | F                 |
| PDH            | 38  | pyr_c = accoa_c + co2_c + NADH    | abc = bc + a + X              | F                 |
| TCA            | 39  | accoa_c + oaa_c = cit_c           | ab + cdef = fedbac            | F                 |
|                | 40  | cit_c = icit_c                    | abcdef = abcdef               | FR                |
|                | 41  | icit_c = cit_c                    | abcdef = abcdef               | R                 |
|                | 42  | icit_c = akc_c + co2_c + NADPH    | abcdef = abcde + f + X        | FR                |
|                | 43  | akc_c + co2_c + NADPH = icit_c    | abcde + f + X = abcdef        | R                 |

| Pathway                         | No. | Reaction                                  | Rearrangement of carbon atoms   | Type of reaction* |
|---------------------------------|-----|-------------------------------------------|---------------------------------|-------------------|
|                                 | 44  | akg_c = co2_c + succoa_c + NADH           | abcde = a + bcde + X            | F                 |
|                                 | 45  | succoa_c = succ_c + ATP                   | abcd = abcd + X                 | FR                |
|                                 | 46  | succ_c + ATP = succoa_c                   | abcd + X = abcd                 | R                 |
|                                 | 47  | succ_c = 0.5fum + 0.5fum + FADH           | abcd = 0.5abcd + 0.5dcba + X    | FR                |
|                                 | 48  | fum + FADH = 0.5succ_c + 0.5succ_c        | abcd + X = 0.5abcd + 0.5dcba    | R                 |
|                                 | 49  | fum = mal_L_c                             | abcd = abcd                     | FR                |
|                                 | 50  | mal_L_c = 0.5fum + 0.5fum                 | abcd = 0.5abcd + 0.5dcba        | R                 |
|                                 | 51  | mal_L_c = oaa_c + NADH                    | abcd = abcd + X                 | FR                |
|                                 | 52  | oaa_c + NADH = mal_L_c                    | abcd + X = abcd                 | R                 |
| GLX shunt                       | 53  | icit_c = glx_c + 0.5succ_c + 0.5succ_c    | abcdef = ab + 0.5cdef + 0.5fedc | F                 |
|                                 | 54  | accoa_c + glx_c = mal_L_c                 | ab + cd = cdab                  | F                 |
| malic enzyme                    | 55  | mal_L_c = co2_c + pyr_c + NADH            | abcd = d + abc + X              | F                 |
|                                 | 56  | mal_L_c = co2_c + pyr_c + NADPH           | abcd = d + abc + X              | F                 |
| PCK                             | 57  | oaa_c + ATP = co2_c + pep_c               | abcd + X = d + abc              | F                 |
| PPC                             | 58  | co2_c + pep_c = oaa_c                     | d + abc = abcd                  | F                 |
| Acetate synthesis and excretion | 59  | accoa_c = ac_c + ATP                      | ab = ab + X                     | FR                |
|                                 | 60  | ac_c + ATP = accoa_c                      | ab + X = ab                     | R                 |
|                                 | 61  | pyr_c + q8 = ac_c + co2_c + q8h2          | abc + X = bc + a + X            | F                 |
|                                 | 62  | ac_c = ac_ex                              | ab = ab                         | F                 |
| CO2 excretion                   | 63  | co2_c = co2_ex                            | a = a                           | F                 |
| CO2 exchange                    | 64  | co2_nat + co2_c = co2_c + co2_nat         | a + b = a + b                   | F                 |
| C1 metabolism                   | 65  | mLthf_c = 10fthf_c + NADPH                | a = a + X                       | F                 |
|                                 | 66  | mLthf_c + NADH = 5mthf_c                  | a + X = a                       | F                 |
| Glu synthesis                   | 67  | akg_c + NADPH + NH3 = glu_L_c             | abcde + X + X = abcde           | F                 |
| Asp synthesis                   | 68  | glu_L_c + oaa_c = akg_c + asp_L_c         | abcde + fghi = abcde + fghi     | FR                |
|                                 | 69  | akg_c + asp_L_c = glu_L_c + oaa_c         | abcde + fghi = abcde + fghi     | R                 |
| Ala synthesis                   | 70  | glu_L_c + pyr_c = akg_c + ala_L_c         | abcde + fgh = abcde + fgh       | F                 |
| Gln synthesis                   | 71  | glu_L_c + ATP + NH3 = gln_L_c             | abcde + X + X = abcde           | F                 |
| Ser synthesis                   | 72  | 3pg_c + glu_L_c = akg_c + pser_L_c + NADH | abc + defgh = defgh + abc + X   | F                 |
|                                 | 73  | pser_L_c = ser_L_c                        | abc = abc                       | F                 |
| Ser degradation                 | 74  | ser_L_c = pyr_c + NH3                     | abc = abc + X                   | F                 |
| Gly synthesis                   | 75  | ser_L_c = gly_c + mLthf_c                 | abc = ab + c                    | FR                |
|                                 | 76  | gly_c + mLthf_c = ser_L_c                 | ab + c = abc                    | R                 |
|                                 | 77  | thr_L_c = accoa_c + gly_c + NADH          | abcd = cd + ab + X              | F                 |
| Gly cleavage                    | 78  | gly_c = co2_c + mLthf_c + NADH + NH3      | ab = a + b + X + X              | F                 |
| Val synthesis                   | 79  | pyr_c + pyr_c = alac_S_c + co2_c          | abc + def = abcef + d           | F                 |
|                                 | 80  | alac_S_c + NADPH = 3mob_c                 | abcde + X = abdce               | F                 |
|                                 | 81  | 3mob_c + glu_L_c = akg_c + val_L_c        | abcde + fghij = fghij + abcde   | F                 |
| Leu synthesis                   | 82  | 3mob_c + accoa_c = 3c3hmp_c               | abcde + fg = abfgcde            | F                 |
|                                 | 83  | 3c3hmp_c = 2ippc                          | abcdefg = abcdefg               | F                 |
|                                 | 84  | 2ippc = 3c2hmp_c                          | abcdefg = abcdefg               | F                 |
|                                 | 85  | 3c2hmp_c = 3c4mop_c + NADH                | abcdefg = abcdefg + X           | F                 |
|                                 | 86  | 3c4mop_c = 4mop_c + co2_c                 | abcdefg = bcdefg + a            | F                 |

| Pathway                 | No. | Reaction                                              | Rearrangement of carbon atoms                | Type of reaction* |
|-------------------------|-----|-------------------------------------------------------|----------------------------------------------|-------------------|
|                         | 87  | 4mop_c + glu_L_c = akg_c + leu_L_c                    | abcdef + ghijk = ghijk + abcdef              | F                 |
| Ile synthesis           | 88  | thr_L_c = 2obut_c + NH3                               | abcd = abcd + X                              | F                 |
|                         | 89  | 2obut_c + pyr_c = 2ahbut_c + co2_c                    | abcd + efg = abcdfg + e                      | F                 |
|                         | 90  | 2ahbut_c + NADPH = 23dhmp_c                           | abcdef + X = abecdf                          | F                 |
|                         | 91  | 23dhmp_c = 3mop_c                                     | abcdef = abcdef                              | F                 |
|                         | 92  | 3mop_c + glu_L_c = akg_c + ile_L_c                    | fghijk + abcde = abcde + fghijk              | F                 |
| Phe, Tyr, Trp synthesis | 93  | e4p_c + pep_c = 2dda7p_c                              | abcd + efg = efgabcd                         | F                 |
|                         | 94  | 2dda7p_c + NADPH = skm_c                              | abcdefg + X = bcdefga                        | F                 |
|                         | 95  | skm_c + ATP = skm5p_c                                 | abcdefg + X = abcdefg                        | F                 |
|                         | 96  | pep_c + skm5p_c = 3psme_c                             | hij + abcdefg = abcdefhijg                   | F                 |
|                         | 97  | 3psme_c = chor_c                                      | abcdefghij = abcdefghij                      | F                 |
|                         | 98  | chor_c = pphn_c                                       | abcdefghij = abcdefghij                      | F                 |
|                         | 99  | pphn_c = co2_c + phpyr_c                              | abcdefghij = j + ghiabcdef                   | F                 |
|                         | 100 | glu_L_c + phpyr_c = akg_c + phe_L_c                   | abcde + fghijklmn = abcde + fghijklmn        | F                 |
|                         | 101 | pphn_c = 34hpp_c + co2_c + NADH                       | abcdefghij = ghiabcdef + j + X               | F                 |
|                         | 102 | 34hpp_c + glu_L_c = akg_c + tyr_L_c                   | fghijklmn + abcde = abcde + fghijklmn        | F                 |
|                         | 103 | chor_c + gln_L_c = anth_c + glu_L_c + pyr_c           | abcdefghij + klmno = abcdefg + klmno + ghi   | F                 |
|                         | 104 | anth_c + prpp_c = pran_c                              | abcdefg + hijkl = abcdefghijkl               | F                 |
|                         | 105 | pran_c = 2cpr5p_c                                     | abcdefghijkl = hijklbafedcg                  | F                 |
|                         | 106 | 2cpr5p_c = 3ig3p_c + co2_c                            | abcdefghijkl = edcabghijkf + l               | F                 |
|                         | 107 | 3ig3p_c = g3p_c + indole_c                            | abcdefghijk = cba + defghijk                 | F                 |
|                         | 108 | indole_c + ser_L_c = trp_L_c                          | defghijk + abc = abcdefghijk                 | F                 |
| Cys synthesis           | 109 | accoa_c + ser_L_c = acser_c                           | ab + cde = cdeab                             | F                 |
|                         | 110 | acser_c + h2s = ac_c + cys_L_c                        | abcde + X = de + abc                         | F                 |
| Met synthesis           | 111 | hoL_c + succoa_c = suchms_c                           | abcd + efgh = abcdefgh                       | F                 |
|                         | 112 | cys_L_c + suchms_c = cyst_L_c + 0.5succ_c + 0.5succ_c | ijk + abcdefgh = abcdkji + 0.5efgh + 0.5hgfe | F                 |
|                         | 113 | cyst_L_c = hcys_L_c + pyr_c + NH3                     | abcdefg = abcd + gfe + X                     | F                 |
|                         | 114 | 5mthf_c + hcys_L_c = met_L_c                          | e + abcd = abcde                             | F                 |
| Lys synthesis           | 115 | asp_L_c + ATP + NADPH = aspsa_c                       | abcd + X + X = abcd                          | F                 |
|                         | 116 | aspsa_c + pyr_c = 23dhdp_c                            | abcd + efg = abcdgfe                         | F                 |
|                         | 117 | 23dhdp_c + NADPH = thdp_c                             | abcdefg + X = abcdefg                        | F                 |
|                         | 118 | succoa_c + thdp_c = sl2a6o_c                          | hijk + abcdefg = abcdefghijk                 | F                 |
|                         | 119 | glu_L_c + sl2a6o_c = akg_c + sl26da_c                 | lmnop + abcdefghijk = lmnop + abcdefghijk    | F                 |
|                         | 120 | sl26da_c = 26dap_LL_c + 0.5succ_c + 0.5succ_c         | abcdefghijk = abcdefg + 0.5hijk + 0.5kjih    | F                 |
|                         | 121 | 26dap_LL_c = 0.526dap_c + 0.526dap_c                  | abcdefg = 0.5abcdefg + 0.5gfedcba            | F                 |
|                         | 122 | 26dap_c = co2_c + lys_L_c                             | abcdefg = g + abcdef                         | F                 |
| Pro synthesis           | 123 | glu_L_c + ATP + NADPH + NADPH = pro_L_c               | abcde + X + X + X = abcde                    | F                 |
| Arg synthesis           | 124 | accoa_c + glu_L_c = acglu_c                           | ab + cdefg = cdefgab                         | F                 |
|                         | 125 | acglu_c + ATP = acg5p_c                               | abcdefg + X = abcdefg                        | F                 |
|                         | 126 | acg5p_c + NADPH = acg5sa_c                            | abcdefg + X = abcdefg                        | F                 |
|                         | 127 | acg5sa_c + glu_L_c = acorn_c + akg_c                  | abcdefg + hijkl = abcdefg + hijkl            | F                 |
|                         | 128 | acorn_c = ac_c + orn_c                                | abcdefg = fg + abcde                         | F                 |
|                         | 129 | co2_c + gln_L_c + ATP + ATP = cbp_c + glu_L_c         | a + bcdef + X + X = a + bcdef                | F                 |
|                         | 130 | cbp_c + orn_c = citr_L_c                              | f + abcde = abcdef                           | F                 |

| Pathway                             | No. | Reaction                                      | Rearrangement of carbon atoms           | Type of reaction* |
|-------------------------------------|-----|-----------------------------------------------|-----------------------------------------|-------------------|
|                                     | 131 | asp_L_c + citr_L_c + ATP + ATP = argsuc_c     | abcd + efghij + X + X = efghijabcd      | F                 |
|                                     | 132 | argsuc_c = arg_L_c + 0.5fum + 0.5fum          | abcdefghij = abcdef + 0.5ghij + 0.5jihg | F                 |
| Thr synthesis                       | 133 | aspsa_c + NADPH = hoL_c                       | abcd + X = abcd                         | F                 |
|                                     | 134 | hoL_c + ATP = thr_L_c                         | abcd + X = abcd                         | F                 |
| Asn synthesis                       | 135 | asp_L_c + ATP + ATP + NH3 = asn_L_c           | abcd + X + X + X = abcd                 | F                 |
| His synthesis                       | 136 | atp_c + prpp_c = prbatp_c + aicar_c           | f + abcde = abcdef + X                  | F                 |
|                                     | 137 | prbatp_c = prlp_c                             | abcdef = abcdef                         | F                 |
|                                     | 138 | gln_L_c + prlp_c = eig3p_c + glu_L_c          | abcde + fghijk = fghijk + abcde         | F                 |
|                                     | 139 | eig3p_c = imacp_c                             | abcdef = abcdef                         | F                 |
|                                     | 140 | glu_L_c + imacp_c = akc_c + hisp_c            | abcde + fghijk = abcde + fghijk         | F                 |
|                                     | 141 | hisp_c = his_L_c + 2NADH                      | abcdef = abcdef + X                     | F                 |
| UTP, CTP                            | 142 | asp_L_c + cbp_c + q8 = orot_c + q8h2          | abcd + e + X = abcde + X                | F                 |
|                                     | 143 | orot_c + prpp_c + ATP = udp_c + co2_c         | abcde + X + X = bcde + a                | F                 |
|                                     | 144 | udp_c + ATP = utp_c                           |                                         | B                 |
|                                     | 145 | utp_c + gln_L_c + ATP = ctp_c + glu_L_c       | X + abcde + X = X + abcde               | F                 |
| IMP                                 | 146 | gln_L_c + prpp_c = glu_L_c + pram_c           | abcde + X = abcde + X                   | F                 |
|                                     | 147 | pram_c + gly_c + ATP = gar_c                  |                                         | B                 |
|                                     | 148 | gar_c + 10fthf_c + ATP = fgam_c               |                                         | B                 |
|                                     | 149 | fgam_c + gln_L_c + ATP = fpram_c + glu_L_c    | X + abcde + X = X + abcde               | F                 |
|                                     | 150 | fpram_c + co2_c + 2ATP = 5caiz_c              |                                         | B                 |
|                                     | 151 | 5caiz_c + asp_L_c + ATP = 25aics_c            | X + abcd + X = abcd                     | F                 |
|                                     | 152 | 25aics_c = aicar_c + 0.5fum + 0.5fum          | abcd = X + 0.5abcd + 0.5dcba            | F                 |
|                                     | 153 | aicar_c + 10fthf_c = imp                      | X + a = a                               | F                 |
| ATP                                 | 154 | asp_L_c + imp + ATP = dcamp_c                 | abcd + e + X = abcde                    | F                 |
|                                     | 155 | dcamp_c + ATP = adp_c + 0.5fum + 0.5fum       | abcde + X = e + 0.5abcd + 0.5dcba       | F                 |
|                                     | 156 | adp_c + 0.5NADH + 0.25O2 = atp_c              | a + X + X = a                           | F                 |
| GTP                                 | 157 | gln_L_c + imp + 4ATP = glu_L_c + gtp_c + NADH | abcde + X + X = abcde + X + X           | F                 |
| dNTP<br>(via<br>thioredoxine)       | 158 | ctp_c + NADPH = dctp_c                        |                                         | B                 |
|                                     | 159 | atp_c + NADPH = datp_c                        |                                         | B                 |
|                                     | 160 | gtp_c + NADPH = dgtp_c                        |                                         | B                 |
|                                     | 161 | udp_c + NADPH = dump_c                        |                                         | B                 |
|                                     | 162 | utp_c + NADPH = dump_c                        |                                         | B                 |
| dTTP                                | 163 | dump_c + mLthf_c + 2ATP = dttp_c              |                                         | B                 |
| Biomass                             | 164 | biomass                                       |                                         | B                 |
| Not carbon<br>exchange<br>reactions | 169 | so4_e + ATP = so4                             |                                         | **                |
|                                     | 170 | so4 + 3ATP + 4NADPH = h2s                     |                                         |                   |
|                                     | 171 | NH3_ex = NH3                                  |                                         |                   |
|                                     | 172 | O2_ex = O2                                    |                                         |                   |
|                                     | 173 | ATP = ATP_ex                                  |                                         |                   |
|                                     | 174 | NADH = NADPH                                  |                                         |                   |
|                                     | 175 | 2NADH + O2 = 4ATP                             |                                         |                   |
|                                     | 176 | 2FADH + O2 = 2ATP                             |                                         |                   |

\* F – irreversible reaction, FR – forward branch of a reversible reaction, R – backward branch of a reversible reaction, B – reactions that are taken into account at carbon

balancing, but not at isotopomer balancing (typically reactions that drain biomass precursors).

\*\* The reactions Nos. 169-176 were excluded from the model used for flux calculation, as they do not relate to carbon or isotopomer balancing.

**Table S2.** Biomass composition of *E. coli* strains.

| Biomass component             | MG1655 | MG1655<br><i>IS5.8::P<sub>L</sub>-<br/>hppa<sup>Rru</sup></i> | MG1655<br><i>IS5.8::P<sub>L</sub>-<br/>hppa<sup>Rru</sup><br/>Δppa::cat</i> | MG1655<br><i>IS5.8::P<sub>L</sub>-<br/>hppa<sup>Rru</sup><br/>Δppa::cat</i><br>(K <sub>DW/OD</sub> = 0.51) |
|-------------------------------|--------|---------------------------------------------------------------|-----------------------------------------------------------------------------|------------------------------------------------------------------------------------------------------------|
| Protein, g/gDW                | 0.55*  | 0.55*                                                         | 0.45*                                                                       | 0.6                                                                                                        |
| RNA, g/gDW                    | 0.12*  | 0.12*                                                         | 0.08*                                                                       | 0.1                                                                                                        |
| DNA, g/gDW                    | 0.03   | 0.03                                                          | 0.03                                                                        | 0.03                                                                                                       |
| Phospholipids, g/gDW          | 0.16   | 0.16                                                          | 0.23                                                                        | 0.14                                                                                                       |
| Lipopolysaccharides,<br>g/gDW | 0.06   | 0.06                                                          | 0.09                                                                        | 0.05                                                                                                       |
| Peptidoglycan, g/gDW          | 0.04   | 0.04                                                          | 0.06                                                                        | 0.04                                                                                                       |
| Glycogen, g/gDW               | 0.04   | 0.04                                                          | 0.06                                                                        | 0.04                                                                                                       |

\* The values were determined experimentally.

**Table S3.** Growth characteristics of *E. coli* MG1655, MG1655 *IS5.8::P<sub>L</sub>-hppa<sup>Rru</sup>*, and MG1655 *IS5.8::P<sub>L</sub>-hppa<sup>Rru</sup> Δppa::cat* strains under batch cultivation conditions.

| Parameter                                                  | MG1655      | MG1655 <i>IS5.8::P<sub>L</sub>-<br/>hppa<sup>Rru</sup></i> | MG1655 <i>IS5.8::P<sub>L</sub>-hppa<sup>Rru</sup><br/>Δppa::cat</i> |
|------------------------------------------------------------|-------------|------------------------------------------------------------|---------------------------------------------------------------------|
| μ, 1/hour                                                  | 0.64 ± 0.07 | 0.59 ± 0.06                                                | 0.23 ± 0.02                                                         |
| Biomass yield, gDW/g                                       | 0.40 ± 0.01 | 0.41 ± 0.01                                                | 0.30 ± 0.01                                                         |
| q glucose, mmol/gDW*hour                                   | 9 ± 1       | 8.2 ± 0.5                                                  | 4.3 ± 0.2                                                           |
| q CO <sub>2</sub> , mmol/gDW*hour                          | 17 ± 4      | 18 ± 3                                                     | 12 ± 3                                                              |
| q Acetate, mmol/gDW*hour                                   | 3.3 ± 0.1   | 3.1 ± 0.1                                                  | 3.2 ± 0.7                                                           |
| K <sub>595</sub> , mg DW in 1 mL at OD <sub>595</sub> of 1 | 0.51 ± 0.03 | 0.52 ± 0.02                                                | 0.68 ± 0.02                                                         |

|                                 |        |            |          |
|---------------------------------|--------|------------|----------|
| C-mol yield biomass, %          | 48 ± 2 | 50 ± 2     | 37 ± 3   |
| C-mol yield CO <sub>2</sub> , % | 33 ± 2 | 36 ± 4     | 46 ± 11  |
| C-mol yield acetate, %          | 13 ± 2 | 12.5 ± 0.2 | 24 ± 5   |
| C-mol balance, %                | 93 ± 2 | 98 ± 2     | 108 ± 14 |

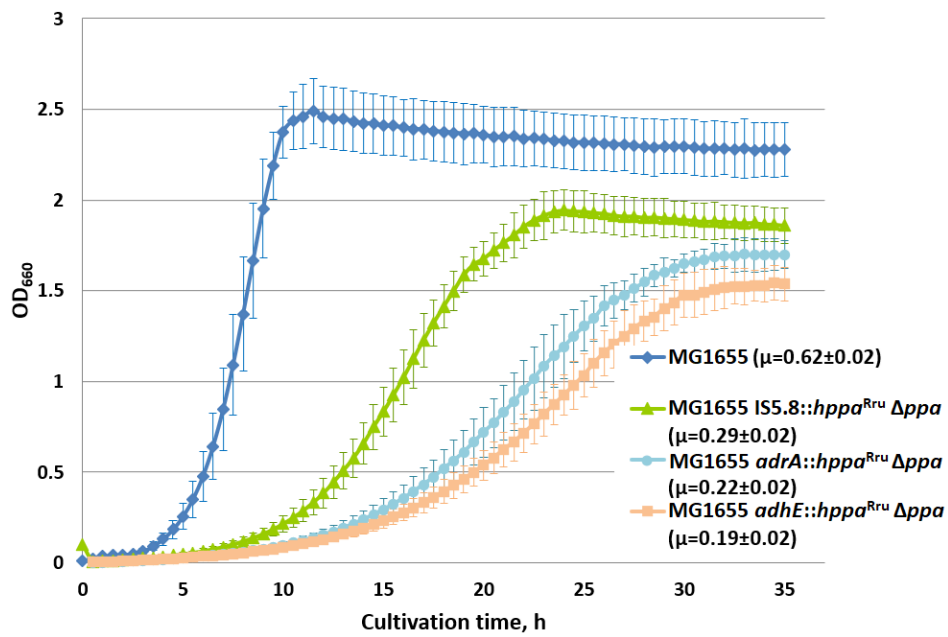

**Figure S1.** Growth of strains with the *hppa*<sup>Rru</sup> gene in the presence and absence of *E. coli ppa* gene. Cells were grown with aeration in L-tubes with M9 minimal medium supplemented with 0.3% of glucose at 37 °C in Advantec photorecorder. MG1655, MG1655 wild-type; MG1655- *IS5.8::hppa*<sup>Rru</sup>  $\Delta$ *ppa*, MG1655 *IS5.8::P<sub>L</sub>-hppa*<sup>Rru</sup>  $\Delta$ *ppa::cat*; MG1655 *adrA::hppa*<sup>Rru</sup>  $\Delta$ *ppa*, MG1655 *adrA::P<sub>L</sub>-hppa*<sup>Rru</sup>  $\Delta$ *ppa::cat*; MG1655 *adhE::hppa*<sup>Rru</sup>  $\Delta$ *ppa*, MG1655 *adhE::P<sub>L</sub>-hppa*<sup>Rru</sup>  $\Delta$ *ppa::cat*. Average data are presented; bars refer to standard deviations obtained in three independent experiments.

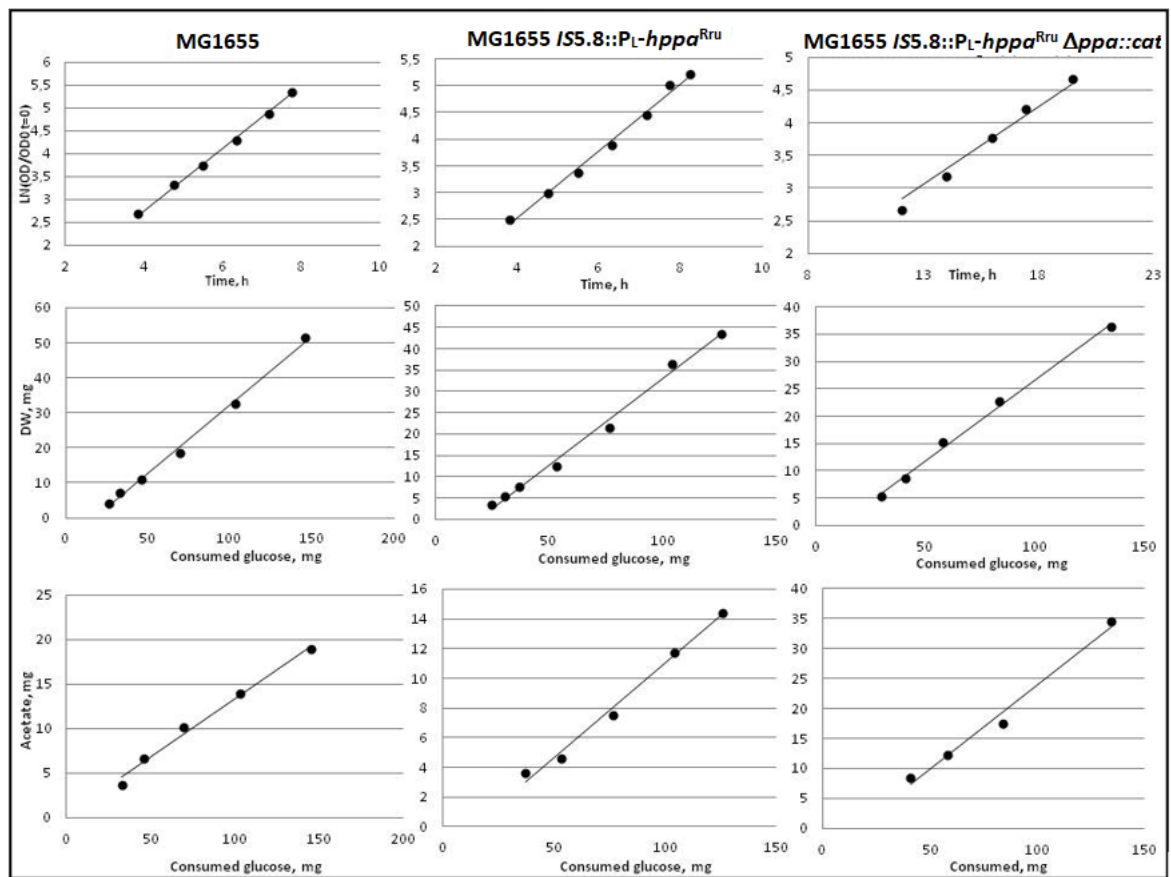

**Figure S2.** Cultivation profiles of *E. coli* strains MG1655, MG1655 *IS5.8::P<sub>L</sub>-hppa<sup>Rru</sup>* and MG1655 *IS5.8::P<sub>L</sub>-hppa<sup>Rru</sup> Δppa::cat* in batch culture with glucose. The metabolic steady-state during cultivation was confirmed by (i) the exponential mode of growth; (ii) linear correlation between production of biomass and glucose consumption; (iii) linear correlation between acetate production and consumption of glucose.

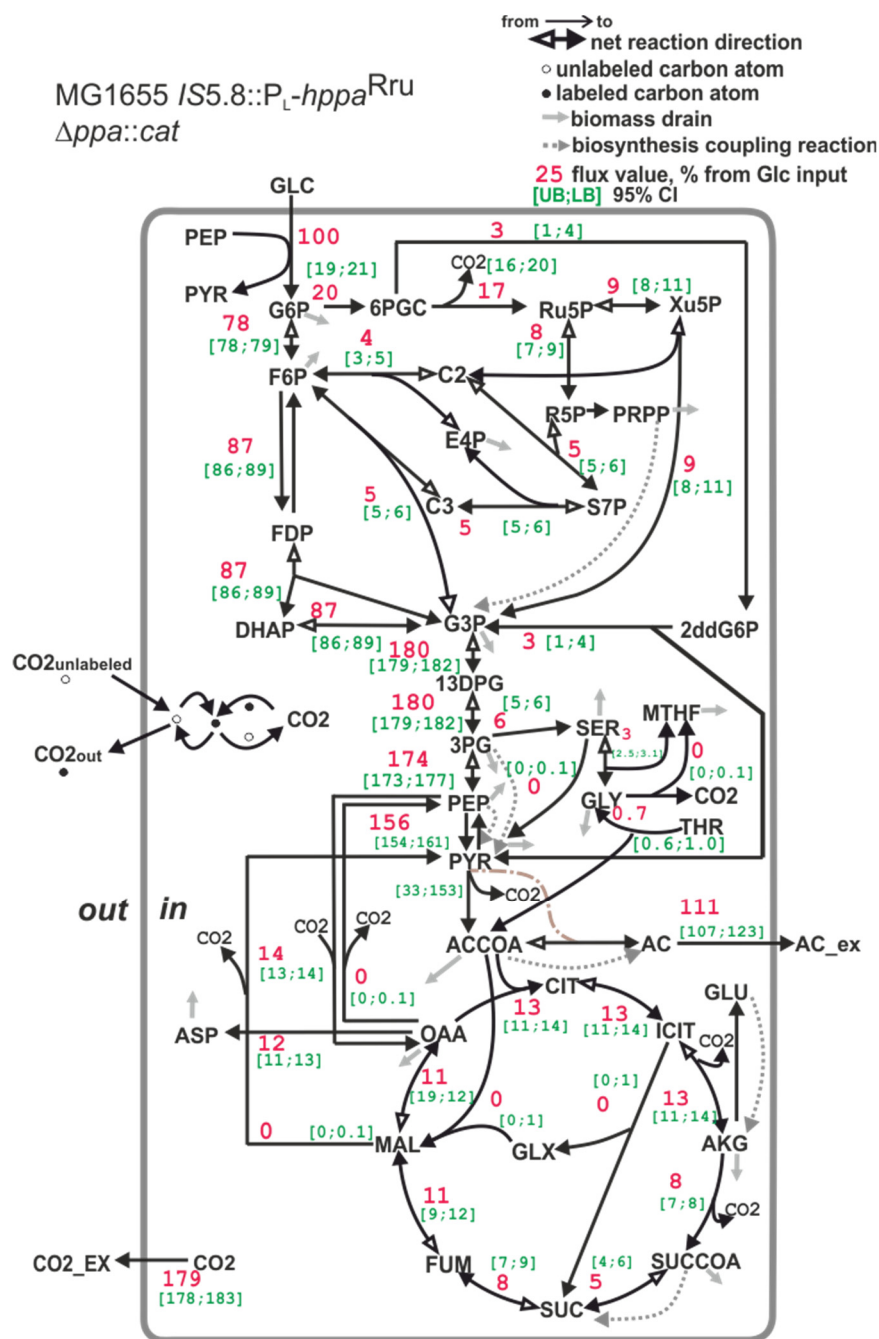

**Figure S3.** The carbon flux distribution in *E. coli* MG1655 *IS5.8::P<sub>L</sub>-hpa<sup>Rru</sup>*  $\Delta ppa::Cm^R$  strain under assumption of the  $K_{DW/OD} = 0.51$ . Flux through the PEP→PYR reaction is a sum of PTS-dependent glucose transport reaction and pyruvate kinase reaction. Flux through the pyruvate dehydrogenase reaction is expressed as a range (see Section 2.9.3.) Accounting for serine degradation to pyruvate (activated, for example, in an *E. coli* *pfkA*-deficient mutant, see [82]) leads to a broad confidence interval of lumped fluxes of phosphoglycerate mutase and enolase, and of pyruvate kinase flux.



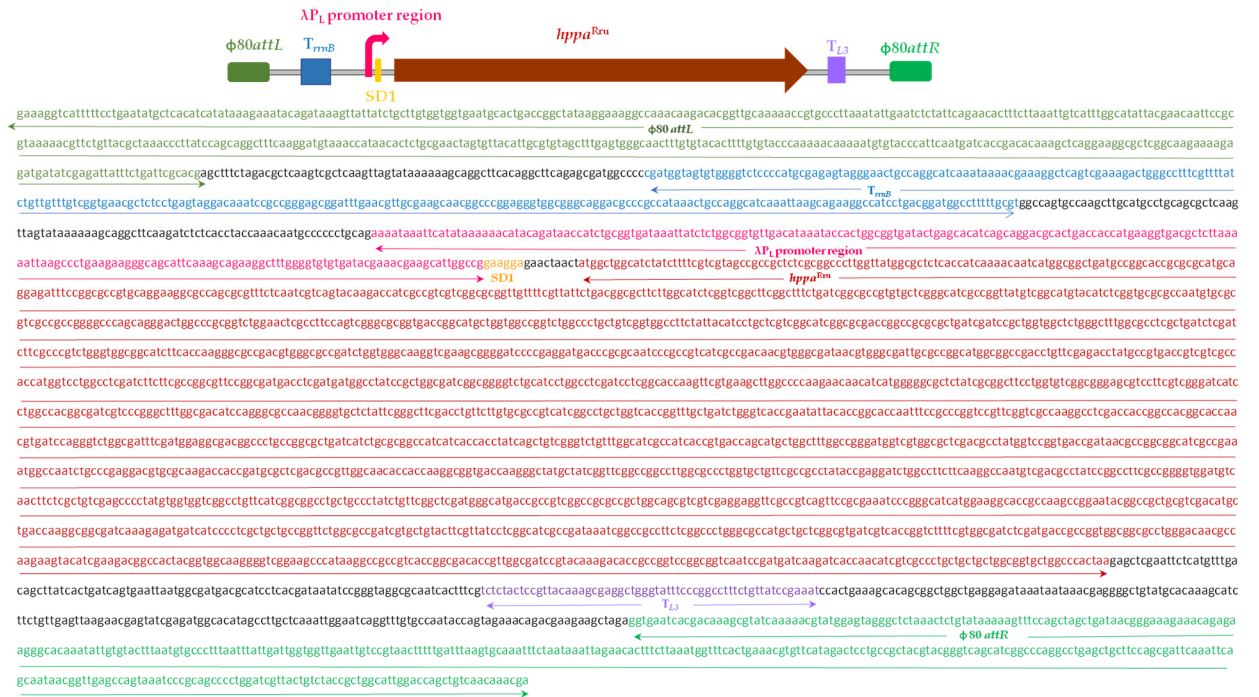

**Figure S4.** Schematic map of  $P_L$ - $hpa^{Rru}$  expression cassette. The  $hpa^{Rru}$  gene and main regulatory elements are shown, including sequence annotation:  $\phi 80attL$  and  $\phi 80attR$  are two hybrid sites, formed on the left and right sides as a result of  $\phi 80$ -mediated integration [2; 3];  $T_{rrnB}$ , terminator region of *E. coli* ribosomal operon *rrnB*;  $\lambda P_L$  promoter region, a promoter region from phage  $\lambda$ ; SD1, Shain-Dalgarno sequence;  $hpa^{Rru}$ , codon-optimized sequence of *R. rubrum hpa* gene;  $T_{L3}$ , phage  $\lambda$  terminator.

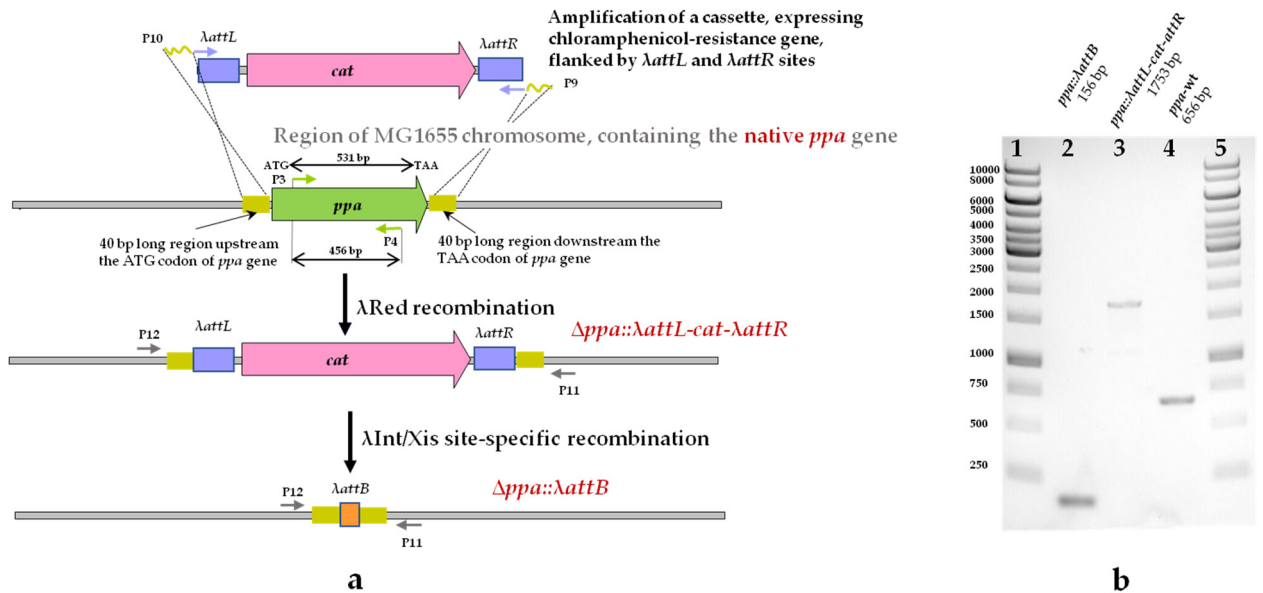

**Figure S5.** Construction of the essential *ppa* gene deletion in *E. coli* chromosome. (a) The scheme shows all steps of construction including (b) verification of *ppa* gene deletion by PCR analysis. P9, P10 – primers for amplification of the fragment for the *ppa* gene deletion; P11, P12 – primers for verification of *ppa* gene deletion. Lanes 1 and 5, DNA molecular weight Marker (1 kb Ladder); lane 2, PCR fragment of the marker-less *ppa* gene deletion,  $\Delta ppa::\lambda attB$  (156 bp); lane 3, PCR fragment of *ppa* gene deletion marked by chloramphenicol resistance marker,  $\Delta ppa::\lambda attL$ -*cat*- $\lambda attR$  (1753 bp); lane 4, PCR fragment of the wild-type *ppa* gene. The primers P3

and P4, which were used to prepare the biotin-labeled probes for Southern-blot analysis, are also indicated.
